# Supplementary material
Source: PubMed Central journal article supplement (PMC2754870)
Supplement: NIHMS98568-supplement-supplement_1.pdf [file NIHMS98568-supplement-supplement_1.pdf]

**Table 1. Distinct domains within IL-17RA regulate C/EBP $\beta$  phosphorylation.** IL-17RA<sup>KO</sup> cells stably expressing IL-17RA.V553H or IL-17RA $\Delta$ 665 were treated with IL-17 for 0, 15, 30 or 30 minutes, and tandem MS/MS analysis was performed as described for Figure 2.

**Table 2. ERK and GSK3 $\alpha/\beta$  inhibitors block phosphorylation of the C/EBP $\beta$  RD2 domain.** ST2 cells were treated with IL-17 for the indicated times in the presence of PD98095 (ERK inhibitor) or the GSK Inhibitor I and tandem MS/MS analysis was performed as described for Figure 2.

**Table 3. GSK3 $\beta$ -deficient cells fail to induce phosphorylation at T179.** ST2 cells were treated with IL-17 for the indicated times, and tandem MS/MS analysis was performed as described for Figure 2.

**Supplementary Figure 1. Identification of the C/EBP $\beta$ -specific RD2 peak by tandem MS/MS analysis.** C/EBP $\beta$ <sup>KO</sup> cells were transfected with nothing (panel A) or with a WT C/EBP $\beta$ -LAP construct (panels B-D), stimulated with the indicated times with IL-17, and nuclear extracts were evaluated by tandem MS/MS and CID as described in Fig. 2. Peaks corresponding to the unphosphorylated RD2 peptide (m/z 1067.7), the singly phosphorylated peak (m/z 1094) and the double phosphorylated peak (m/z 1120) are indicated in red.

A.

C/EBP $\beta$  $\delta$ KO

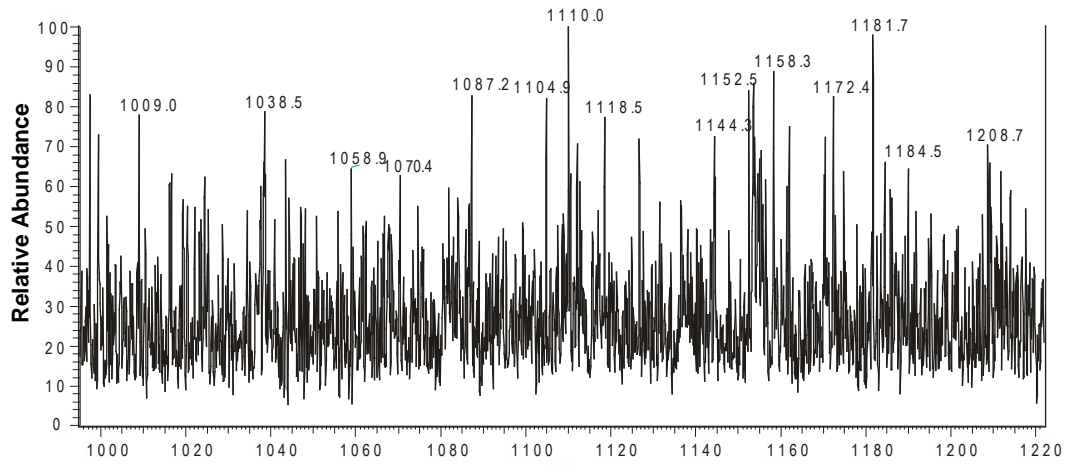

B.

C/EBP $\beta$  $\delta$ KO  
+ C/EBP $\beta$   
Untreated

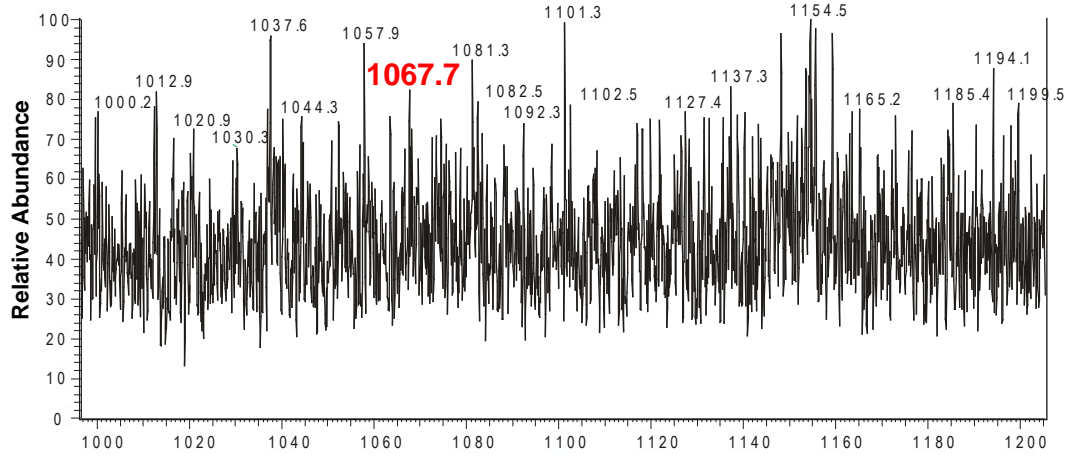

C.

C/EBP $\beta$  $\delta$ KO  
+ C/EBP $\beta$   
IL-17, 15 min.

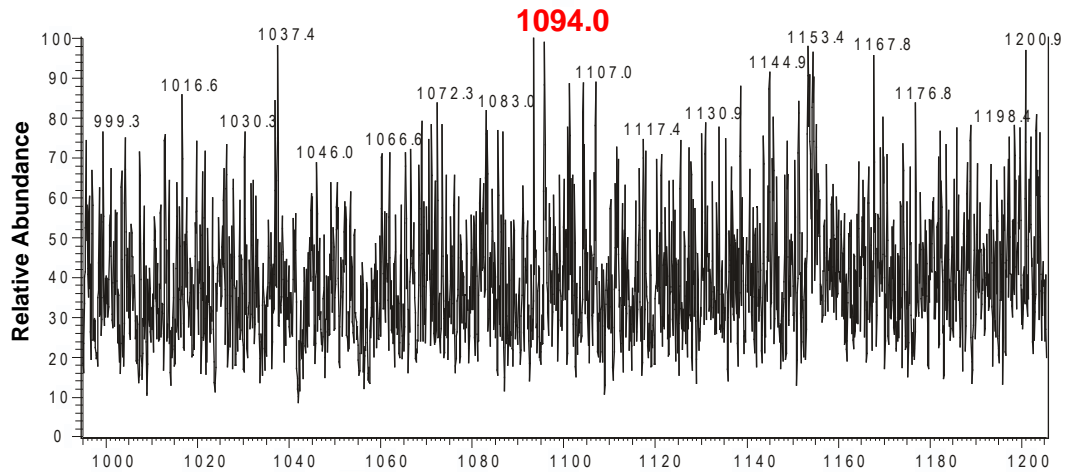

D.

C/EBP $\beta$  $\delta$ KO  
+ C/EBP $\beta$   
IL-17, 2 hr

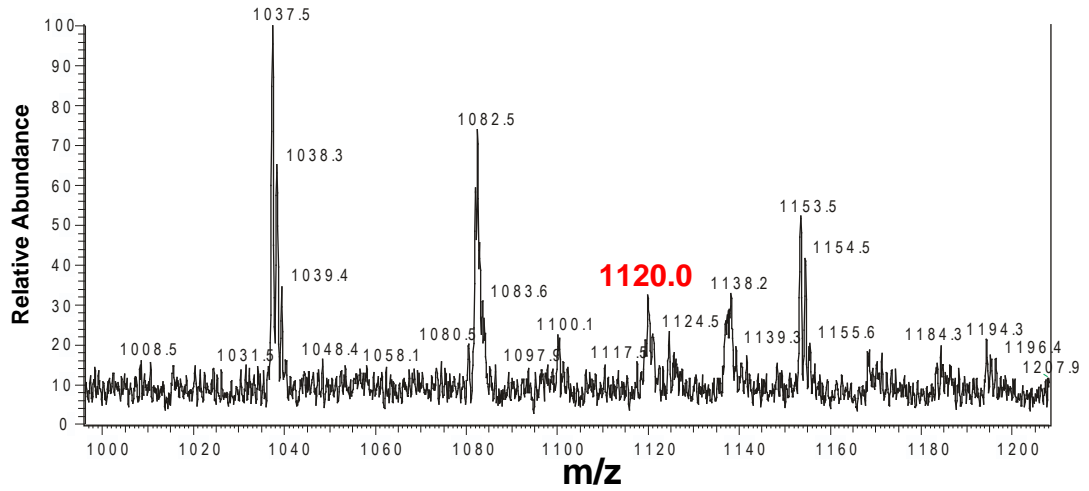

**Supplementary Table 1. Identification of phosphorylation sites in murine C/EBP $\beta$ .** Phosphopeptide fragments generated by collision induced dissociation (CID) are indicated. \* Indicates characteristic neutral loss of a phosphoric acid group in the MS/MS spectrum.

| Fragment                                          | Theoretical Peak<br>(Unmodified) |       | Experimental Peak |                    |                    |
|---------------------------------------------------|----------------------------------|-------|-------------------|--------------------|--------------------|
|                                                   |                                  |       | m/z: 1067         | m/z: 1094          | m/z: 1120          |
| <b>y<sub>4</sub>-NH<sub>3</sub></b>               | 387.2                            | --    |                   | 387.3              | --                 |
| <b>y<sub>5</sub>-H<sub>2</sub>O</b>               | 483.3                            | --    |                   | --                 | 483.4              |
| <b>y<sub>5</sub></b>                              | 501.3                            | 501.2 |                   | 501.2              | 501.1              |
| <b>y<sub>6</sub>-H<sub>2</sub>O</b>               | 570.3                            | 570.3 |                   | 570.3              | 570.3              |
| <b>y<sub>6</sub>-NH<sub>3</sub></b>               | 571.3                            | 571.4 |                   | 571.3              | 571.4              |
| <b>y<sub>6</sub></b>                              | 588.3                            | --    |                   | 588.3              | 588.5              |
| <b>y<sub>7</sub>-H<sub>2</sub>O<sup>+2</sup></b>  | 334.2                            | --    |                   | 334.1              | --                 |
| <b>y<sub>7</sub>-H<sub>2</sub>O</b>               | 667.3                            | 667.2 |                   | --                 | 667.2              |
| <b>y<sub>7</sub>-NH<sub>3</sub></b>               | 668.3                            | 668.2 |                   | 668.3              | 668.4              |
| <b>y<sub>8</sub>-NH<sub>3</sub><sup>+2</sup></b>  | 385.2                            | 385.5 |                   | --                 | 425.3              |
| <b>y<sub>8</sub><sup>+2</sup></b>                 | 393.7                            | --    |                   | 433.3              | 433.1              |
| <b>y<sub>8</sub>-H<sub>2</sub>O</b>               | 768.4                            | 768.4 |                   | 848.0              | 848.6              |
| <b>y<sub>8</sub>-NH<sub>3</sub></b>               | 769.4                            | 769.4 |                   | --                 | 849.6              |
| <b>y<sub>8</sub></b>                              | 786.4                            | 786.4 |                   | 866.6              | 866.3              |
| <b>y<sub>8</sub><sup>*</sup></b>                  | 786.4                            | 786.4 |                   | --                 | 768.5 <sup>*</sup> |
| <b>y<sub>9</sub>-H<sub>2</sub>O<sup>+2</sup></b>  | 413.2                            | --    |                   | --                 | 453.0              |
| <b>y<sub>9</sub><sup>+2</sup></b>                 | 422.2                            | 422.7 |                   | 462.7              | --                 |
| <b>y<sub>9</sub>-H<sub>2</sub>O</b>               | 825.4                            | 825.7 |                   | 905.9              | 905.3              |
| <b>y<sub>9</sub>-NH<sub>3</sub></b>               | 826.4                            | 826.6 |                   | 906.5              | 906.3              |
| <b>y<sub>9</sub></b>                              | 843.4                            | 843.3 |                   | 923.5              | --                 |
| <b>y<sub>9</sub><sup>*</sup></b>                  | 843.4                            | 843.3 |                   | 825.3 <sup>*</sup> | 825.2 <sup>*</sup> |
| <b>y<sub>10</sub>-H<sub>2</sub>O<sup>+2</sup></b> | 461.7                            | --    |                   | 501.8              | 501.1              |
| <b>y<sub>10</sub>-H<sub>2</sub>O</b>              | 922.5                            | 922.8 |                   | 1002.1             | --                 |
| <b>y<sub>10</sub>-NH<sub>3</sub></b>              | 923.5                            | 923.8 |                   | --                 | 1003.5             |

|                                                   |        |        |                     |                     |
|---------------------------------------------------|--------|--------|---------------------|---------------------|
| <b>y<sub>10</sub></b>                             | 940.5  | 940.0  | 1020.8              | 1020.4              |
| <b>y<sub>10</sub><sup>*</sup></b>                 | 940.5  | 940.0  | 922.6 <sup>*</sup>  | 922.3 <sup>*</sup>  |
| <b>y<sub>11</sub>-H<sub>2</sub>O<sup>+2</sup></b> | 510.3  | --     | --                  | 550.0               |
| <b>y<sub>11</sub>-NH<sub>3</sub><sup>+2</sup></b> | 510.8  | 511.1  | --                  | -                   |
| <b>y<sub>11</sub><sup>+2</sup></b>                | 519.3  | 519.7  | 559.2               | 559.3               |
| <b>y<sub>11</sub></b>                             | 1037.5 | 1037.4 | --                  | --                  |
| <b>y<sub>11</sub><sup>*</sup></b>                 | 1037.5 | 1037.4 | 1019.5 <sup>*</sup> | 1019.4 <sup>*</sup> |
| <b>y<sub>11</sub>-H<sub>2</sub>O</b>              | 1019.5 | 1019.7 | 1100.1              | 1099.5              |
| <b>y<sub>11</sub>-NH<sub>3</sub></b>              | 1020.5 | 1020.5 | --                  | --                  |
| <b>y<sub>12</sub>-H<sub>2</sub>O<sup>+2</sup></b> | 553.8  | --     | --                  | 593.9               |
| <b>y<sub>12</sub>-NH<sub>3</sub><sup>+2</sup></b> | 554.3  | --     | 594.5               | 594.3               |
| <b>y<sub>12</sub>-NH<sub>3</sub></b>              | 1107.5 | --     | 1187.1              | --                  |
| <b>y<sub>12</sub></b>                             | 1124.6 | 1124.5 | 1205.1              | --                  |
| <b>y<sub>12</sub><sup>*</sup></b>                 | 1124.6 | 1124.5 | --                  | 1106.0 <sup>*</sup> |
| <b>y<sub>13</sub>-H<sub>2</sub>O<sup>+2</sup></b> | 597.3  | 597.2  | --                  | 637.2               |
| <b>y<sub>13</sub>-NH<sub>3</sub><sup>+2</sup></b> | 597.8  | --     | 637.8               | 637.9               |
| <b>y<sub>13</sub><sup>+2</sup></b>                | 606.3  | 606.5  | --                  | 646.0               |
| <b>y<sub>13</sub>-H<sub>2</sub>O</b>              | 1193.6 | --     | 1273.7              | 1273.5              |
| <b>y<sub>13</sub></b>                             | 1211.6 | 1211.8 | 1291.9              | --                  |
| <b>y<sub>13</sub><sup>*</sup></b>                 | 1211.6 | 1211.8 | --                  | 1193.7 <sup>*</sup> |
| <b>y<sub>14</sub>-H<sub>2</sub>O<sup>+2</sup></b> | 640.8  | 640.8  | --                  | 680.5               |
| <b>y<sub>14</sub>-NH<sub>3</sub><sup>+2</sup></b> | 641.3  | 641.1  | 681.3               | 681.1               |
| <b>y<sub>14</sub><sup>+2</sup></b>                | 649.8  | 649.6  | 689.9               | 689.7               |
| <b>y<sub>15</sub>-H<sub>2</sub>O<sup>+2</sup></b> | 684.3  | 684.4  | 724.4               | 724.1               |
| <b>y<sub>15</sub>-NH<sub>3</sub><sup>+2</sup></b> | 684.8  | --     | 724.8               | 724.5               |
| <b>y<sub>15</sub><sup>+2</sup></b>                | 693.3  | 693.5  | 733.2               | 733.3               |
| <b>y<sub>15</sub>-NH<sub>3</sub></b>              | 1368.6 | 1368.3 | 1448.6              | --                  |
| <b>y<sub>15</sub></b>                             | 1385.6 | --     | 1465.1              | --                  |
| <b>y<sub>16</sub>-H<sub>2</sub>O<sup>+2</sup></b> | 727.8  | 727.7  | 767.5               | 767.9               |

|                                  |        |        |         |         |
|----------------------------------|--------|--------|---------|---------|
| $y_{16}\text{-NH}_3^{+2}$        | 728.3  | --     | --      | 768.5   |
| $y_{16}^{+2}$                    | 736.8  | 736.5  | --      | 776.8   |
| $y_{16}^*$                       | 1472.7 | --     | --      | 1454.7* |
| $y_{17}\text{-H}_2\text{O}^{+2}$ | 778.4  | 778.4  | --      | 858.5   |
| $y_{17}\text{-NH}_3^{+2}$        | 778.9  | 778.7  | 819.3   | 858.9   |
| $y_{17}^{+2}$                    | 787.4  | 787.2  | 827.1   | 867.5   |
| $y_{17}\text{-H}_2\text{O}$      | 1555.7 | --     | 1635.8  | --      |
| $y_{17}^*$                       | 1573.3 | --     | 1556.0* | 1537.2* |
| $y_{18}\text{-H}_2\text{O}^{+2}$ | 821.9  | 821.7  | --      | 901.5   |
| $y_{18}\text{-NH}_3^{+2}$        | 822.4  | 822.9  | 862.5   | 902.5   |
| $y_{18}^{+2}$                    | 830.9  | --     | 870.7   | 910.9   |
| $y_{19}\text{-H}_2\text{O}^{+2}$ | 878.4  | 878.2  | 918.5   | 958.4   |
| $y_{19}\text{-NH}_3^{+2}$        | 878.9  | 878.9  | --      | 959.3   |
| $y_{19}^{+2}$                    | 887.4  | 887.3  | 927.5   | 967.2   |
| $y_{19}\text{-H}_2\text{O}$      | 1755.8 | 1755.9 | --      | 1915.3  |
| $y_{20}\text{-H}_2\text{O}^{+2}$ | 921.9  | 921.9  | --      | 1002.1  |
| $y_{20}\text{-NH}_3^{+2}$        | 922.4  | 922.3  | 962.1   | 1002.8  |
| $y_{20}^{+2}$                    | 930.9  | --     | --      | 1010.7  |
| $y_{20}^*$                       | 1860.9 | --     | 1842.2* | --      |
| $y_{21}\text{-H}_2\text{O}^{+2}$ | 950.4  | 950.3  | 990.3   | 1030.4  |
| $y_{21}\text{-NH}_3^{+2}$        | 950.9  | 950.6  | 990.7   | 1031.1  |
| $y_{21}^{+2}$                    | 959.5  | 959.7  | 1000.1  | 1039.9  |
| $y_{22}\text{-H}_2\text{O}^{+2}$ | 994.0  | 994.1  | 1033.8  | --      |
| $y_{22}\text{-NH}_3^{+2}$        | 994.4  | 994.4  | 1034.3  | 1074.4  |
| $y_{22}^{+2}$                    | 1003.0 | 1003.2 | --      | 1083.1  |
| $y_{23}\text{-H}_2\text{O}^{+2}$ | 1037.5 | 1037.4 | 1077.6  | --      |
| $y_{23}\text{-NH}_3^{+2}$        | 1038.0 | --     | --      | 1118.3  |
| $y_{24}\text{-NH}_3^{+2}$        | 1066.5 | 1066.8 | 1107.1  | --      |
| $y_{24}^{+2}$                    | 1075.0 | --     | 1114.9  | 1155.5  |

|                                                   |        |        |        |        |
|---------------------------------------------------|--------|--------|--------|--------|
| <b>y<sub>25</sub><sup>+2</sup></b>                | 1118.5 | --     | --     | 1198.4 |
| <b>y<sub>25</sub>-H<sub>2</sub>O<sup>+2</sup></b> | 1109.5 | --     | 1149.4 | 1189.1 |
| <b>y<sub>26</sub>-NH<sub>3</sub><sup>+2</sup></b> | 1158.5 | --     | 1198.9 | --     |
| <b>y<sub>27</sub>-H<sub>2</sub>O<sup>+2</sup></b> | 1208.6 | --     | 1248.1 | --     |
| <b>y<sub>27</sub>-NH<sub>3</sub><sup>+2</sup></b> | 1209.1 | 1209.2 | 1249.7 | --     |
| <b>y<sub>28</sub><sup>+2</sup></b>                | 1253.1 | --     | 1293.1 | --     |
| <b>y<sub>29</sub><sup>+2</sup></b>                | 1317.1 | 1317.4 | 1356.9 | --     |
| <b>y<sub>30</sub>-H<sub>2</sub>O<sup>+2</sup></b> | 1389.6 | --     | 1429.2 | --     |
| <b>y<sub>30</sub>-NH<sub>3</sub><sup>+2</sup></b> | 1390.1 | --     | 1430.3 | --     |
| <b>y<sub>30</sub><sup>+2</sup></b>                | 1398.6 | --     | --     | 1478.3 |
| <b>y<sub>33</sub>-NH<sub>3</sub><sup>+2</sup></b> | 1556.7 | 1556.2 | --     | 1636.5 |
| <b>b<sub>4</sub></b>                              | 405.2  | 405.2  | 405.1  | --     |
| <b>b<sub>5</sub></b>                              | 568.3  | --     | --     | 568.7  |
| <b>b<sub>6</sub></b>                              | 696.3  | 696.1  | 696.3  | 696.5  |
| <b>b<sub>6</sub>-NH<sub>3</sub></b>               | 679.3  | 679.1  | 679.3  | 679.5  |
| <b>b<sub>7</sub>-NH<sub>3</sub></b>               | 750.4  | 750.4  | 750.2  | 750.4  |
| <b>b<sub>7</sub></b>                              | 767.4  | 767.3  | 767.3  | -      |
| <b>b<sub>8</sub>-H<sub>2</sub>O</b>               | 850.4  | 850.8  | 850.3  | 850.4  |
| <b>b<sub>8</sub>-NH<sub>3</sub></b>               | 851.4  | --     | 851.4  | 851.3  |
| <b>b<sub>8</sub></b>                              | 868.4  | 868.3  | 868.4  | 868.6  |
| <b>b<sub>9</sub>-H<sub>2</sub>O</b>               | 947.5  | 947.5  | 947.5  | 947.2  |
| <b>b<sub>9</sub>-NH<sub>3</sub></b>               | 948.5  | 948.6  | 948.5  | 948.4  |
| <b>b<sub>9</sub></b>                              | 965.5  | 965.6  | 965.8  | 965.5  |
| <b>b<sub>10</sub></b>                             | 1052.5 | 1052.6 | 1052.3 | 1052.7 |
| <b>b<sub>10</sub>-H<sub>2</sub>O</b>              | 1034.5 | 1034.6 | 1034.5 | 1034.5 |
| <b>b<sub>10</sub>-NH<sub>3</sub></b>              | 1035.5 | 1035.6 | 1035.6 | 1035.5 |
| <b>b<sub>11</sub>-H<sub>2</sub>O</b>              | 1091.5 | --     | --     | 1091.3 |
| <b>b<sub>11</sub>-NH<sub>3</sub></b>              | 1092.5 | --     | 1092.8 | 1092.7 |
| <b>b<sub>11</sub></b>                             | 1109.5 | --     | 1109.8 | 1109.9 |

|                                      |        |        |         |         |
|--------------------------------------|--------|--------|---------|---------|
| <b>b<sub>12</sub>-NH<sub>3</sub></b> | 1179.5 | --     | 1180.3  | --      |
| <b>b<sub>12</sub></b>                | 1196.5 | --     | 1196.1  | 1196.3  |
| <b>b<sub>14</sub>-NH<sub>3</sub></b> | 1323.6 | --     | --      | 1323.5  |
| <b>b<sub>15</sub>-H<sub>2</sub>O</b> | 1409.6 | 1409.8 | --      | 1409.5  |
| <b>b<sub>15</sub>-NH<sub>3</sub></b> | 1410.6 | 1410.5 | --      | --      |
| <b>b<sub>15</sub></b>                | 1427.6 | --     | 1427.8  | --      |
| <b>b<sub>16</sub>-NH<sub>3</sub></b> | 1523.7 | --     | --      | 1523.1  |
| <b>b<sub>17</sub></b>                | 1627.7 | --     | 1627.7  | --      |
| <b>b<sub>17</sub>-H<sub>2</sub>O</b> | 1609.8 | --     | --      | 1609.8  |
| <b>_M+3H_<sup>+3*</sup></b>          | 1067.4 | --     | 1061.5* | 1088.7* |

**Supplementary Table 2. C/EBP $\beta$  phosphorylation in ST2 cells by combinatorial activation of TNF $\alpha$  and IL-17.**

| <i>Treatment of ST2 cells</i> | <i>Unphosphorylated<br/>(m/z=1067)</i> | <i>pT188<br/>(m/z=1095)</i> | <i>pT188, pT179<br/>(m/z=1120)</i> |
|-------------------------------|----------------------------------------|-----------------------------|------------------------------------|
| Untreated                     | -                                      | -                           | -                                  |
| IL-17 15 min                  | -                                      | +                           | -                                  |
| IL-17, 30 min                 | -                                      | +                           | -                                  |
| IL-17, 60 min                 | -                                      | -                           | +                                  |
| IL-17+ TNF $\alpha$ , 15 min  | -                                      | +                           | -                                  |
| IL-17+ TNF $\alpha$ , 30 min  | -                                      | -                           | +                                  |
| IL-17+ TNF $\alpha$ , 60 min  | -                                      | -                           | +                                  |



**Supplementary Table 1. Identification of phosphorylation sites in C/EBP $\beta$  by tandem MS/MS.** Phosphopeptide fragment y and b ions were generated by collision induced dissociation (CID), with the theoretical versus experimental mass values indicated.

**Supplementary Table 2. Accelerated C/EBP $\beta$  phosphorylation by TNF $\alpha$  and IL-17.** ST2 cells were treated with TNF $\alpha$  (2 ng/ml) and IL-17 (100 ng/ml) for the indicated time periods, and tandem MS analysis was performed as described in Figure 2.
